# Supplementary material for: Pathogen Webs in Collapsing Honey Bee Colonies
Source: PLoS One. 2012 Aug 21;7(8):e43562. doi: 10.1371/journal.pone.0043562 (PMC3424165; doi:10.1371/journal.pone.0043562)
Supplement: File S4 — Classifier [27] taxonomic assignments for contigs with at least 80% bootstrap support at the level of order. (XLS) [file pone.0043562.s005.xls]

## Sheet: Sheet1
Supporting Information File S4. Output of the Classifier tool of the RDP ribosomal database for assembled contigs. Percentages are the bootstrap support for the given taxonomic classification.
The authors of Classifier and its web portal are cited in the text.
Contig	Kingdom		Phylum		Class		Order		Family		Genus
Contig469	Bacteria	1	Actinobacteria	1	Actinobacteridae	1	Bifidobacteriales	1	Bifidobacteriaceae	1	Bifidobacterium	100%
Contig803	Bacteria	1	Actinobacteria	1	Actinobacteridae	1	Bifidobacteriales	1	Bifidobacteriaceae	1	Bifidobacterium	100%
Contig2314	Bacteria	1	Actinobacteria	0.98	Actinobacteridae	0.98	Bifidobacteriales	0.98	Bifidobacteriaceae	0.98	Bifidobacterium	96%
Contig2043	Bacteria	1	Proteobacteria	1	Betaproteobacteria	1	Burkholderiales	1	Comamonadaceae	1	Giesbergeria	0.84
Contig1580	Bacteria	1	Firmicutes	1	Clostridia	1	Clostridiales	1	Lachnospiraceae	0.96	Butyrivibrio	0.45
Contig1062	Bacteria	1	Firmicutes	1	Clostridia	1	Clostridiales	1	Incertae Sedis XIV	0.33	Blautia	0.33
Contig1086	Bacteria	1	Firmicutes	1	Clostridia	1	Clostridiales	1	Incertae Sedis XIV	0.45	Blautia	0.45
Contig2282	Bacteria	1	Firmicutes	0.9	Clostridia	0.9	Clostridiales	0.9	Lachnospiraceae	0.84	Syntrophococcus	0.24
Contig1121	Bacteria	1	Firmicutes	0.92	Clostridia	0.91	Clostridiales	0.91	Lachnospiraceae	0.76	Roseburia	0.65
Contig872	Bacteria	1	Proteobacteria	1	Gammaproteobacteria	1	Enterobacteriales	1	Enterobacteriaceae	1	Enterobacter	0.75
Contig943	Bacteria	1	Proteobacteria	1	Gammaproteobacteria	1	Enterobacteriales	1	Enterobacteriaceae	1	Enterobacter	0.43
Contig442	Bacteria	1	Proteobacteria	1	Gammaproteobacteria	1	Enterobacteriales	1	Enterobacteriaceae	1	Serratia	0.66
Contig839	Bacteria	1	Proteobacteria	1	Gammaproteobacteria	1	Enterobacteriales	1	Enterobacteriaceae	1	Yersinia	1
Contig1047	Bacteria	1	Proteobacteria	1	Gammaproteobacteria	1	Enterobacteriales	1	Enterobacteriaceae	1	Buttiauxella	1
Contig1048	Bacteria	1	Proteobacteria	1	Gammaproteobacteria	1	Enterobacteriales	1	Enterobacteriaceae	1	Serratia	0.95
Contig1138	Bacteria	1	Proteobacteria	1	Gammaproteobacteria	1	Enterobacteriales	1	Enterobacteriaceae	1	Serratia	0.33
Contig1213	Bacteria	1	Proteobacteria	1	Gammaproteobacteria	1	Enterobacteriales	1	Enterobacteriaceae	1	Brenneria	0.69
Contig2361	Bacteria	1	Proteobacteria	1	Gammaproteobacteria	1	Enterobacteriales	1	Enterobacteriaceae	1	Buttiauxella	0.55
Contig2334	Bacteria	1	Proteobacteria	1	Gammaproteobacteria	1	Enterobacteriales	1	Enterobacteriaceae	1	Trabulsiella	0.38
Contig588	Bacteria	1	Proteobacteria	1	Gammaproteobacteria	1	Enterobacteriales	0.82	Enterobacteriaceae	0.82	Serratia	0.71
Contig1998	Bacteria	1	Proteobacteria	1	Gammaproteobacteria	1	Enterobacteriales	0.91	Enterobacteriaceae	0.91	Serratia	0.88
Contig902	Bacteria	1	Proteobacteria	1	Gammaproteobacteria	1	Enterobacteriales	0.95	Enterobacteriaceae	0.95	Klebsiella	0.43
Contig900	Bacteria	1	Firmicutes	1	Bacilli	1	Lactobacillales	1	Lactobacillaceae	0.97	Lactobacillus	0.95
Contig471	Bacteria	1	Firmicutes	1	Bacilli	1	Lactobacillales	1	Enterococcaceae	1	Melissococcus	0.94
Contig767	Bacteria	1	Firmicutes	1	Bacilli	1	Lactobacillales	1	Enterococcaceae	1	Enterococcus	1
Contig936	Bacteria	1	Firmicutes	1	Bacilli	1	Lactobacillales	1	Enterococcaceae	1	Enterococcus	0.97
Contig567	Bacteria	1	Firmicutes	1	Bacilli	1	Lactobacillales	1	Enterococcaceae	1	Melissococcus	0.99
Contig1424	Bacteria	1	Firmicutes	1	Bacilli	1	Lactobacillales	1	Enterococcaceae	1	Melissococcus	0.99
Contig1992	Bacteria	1	Firmicutes	1	Bacilli	1	Lactobacillales	1	Enterococcaceae	0.99	Melissococcus	0.96
Contig2289	Bacteria	1	Firmicutes	1	Bacilli	1	Lactobacillales	1	Enterococcaceae	1	Enterococcus	1
Contig880	Bacteria	1	Firmicutes	0.97	Bacilli	0.89	Lactobacillales	0.8	Lactobacillaceae	0.63	Lactobacillus	0.63
Contig497	Bacteria	1	Firmicutes	0.98	Bacilli	0.92	Lactobacillales	0.8	Enterococcaceae	0.4	Bavariicoccus	0.16
Contig537	Bacteria	1	Firmicutes	0.96	Bacilli	0.93	Lactobacillales	0.81	Leuconostocaceae	0.48	Weissella	0.19
Contig559	Bacteria	1	Firmicutes	0.99	Bacilli	0.88	Lactobacillales	0.84	Lactobacillaceae	0.65	Lactobacillus	0.65
Contig571	Bacteria	1	Firmicutes	0.87	Bacilli	0.85	Lactobacillales	0.85	Lactobacillaceae	0.45	Lactobacillus	0.45
Contig602	Bacteria	1	Firmicutes	0.93	Bacilli	0.9	Lactobacillales	0.86	Enterococcaceae	0.57	Atopobacter	0.3
Contig1137	Bacteria	1	Firmicutes	0.9	Bacilli	0.9	Lactobacillales	0.88	Enterococcaceae	0.86	Melissococcus	0.53
Contig597	Bacteria	1	Firmicutes	1	Bacilli	0.99	Lactobacillales	0.93	Lactobacillaceae	0.9	Lactobacillus	0.63
Contig879	Bacteria	1	Firmicutes	0.99	Bacilli	0.97	Lactobacillales	0.94	Lactobacillaceae	0.74	Lactobacillus	0.5
Contig522	Bacteria	1	Firmicutes	0.99	Bacilli	0.97	Lactobacillales	0.94	Lactobacillaceae	0.83	Lactobacillus	0.83
Contig2067	Bacteria	1	Firmicutes	0.97	Bacilli	0.96	Lactobacillales	0.96	Lactobacillaceae	0.96	Lactobacillus	0.96
Contig2351	Bacteria	1	Firmicutes	1	Bacilli	0.99	Lactobacillales	0.98	Lactobacillaceae	0.98	Lactobacillus	0.71
Contig851	Bacteria	1	Firmicutes	1	Bacilli	1	Lactobacillales	0.99	Enterococcaceae	0.78	Enterococcus	0.75
Contig2323	Bacteria	1	Firmicutes	1	Bacilli	1	Lactobacillales	0.99	Enterococcaceae	0.91	Enterococcus	0.9
Contig942	Bacteria	1	Firmicutes	1	Bacilli	0.99	Lactobacillales	0.99	Lactobacillaceae	0.8	Lactobacillus	0.66
Contig1335	Bacteria	1	Firmicutes	1	Bacilli	0.99	Lactobacillales	0.99	Lactobacillaceae	0.98	Lactobacillus	0.98
Contig763	Bacteria	1	Proteobacteria	1	Betaproteobacteria	1	Neisseriales	1	Neisseriaceae	1	Kingella	0.32
Contig895	Bacteria	1	Proteobacteria	1	Betaproteobacteria	1	Neisseriales	1	Neisseriaceae	1	Stenoxybacter	0.79
Contig1993	Bacteria	1	Proteobacteria	1	Betaproteobacteria	0.98	Neisseriales	0.83	Neisseriaceae	0.83	Uruburuella	0.19
Contig682	Bacteria	1	Proteobacteria	1	Gammaproteobacteria	1	Pseudomonadales	1	Pseudomonadaceae	1	Pseudomonas	1
Contig2353	Bacteria	1	Proteobacteria	1	Gammaproteobacteria	1	Pseudomonadales	1	Pseudomonadaceae	1	Pseudomonas	1
Contig2346	Bacteria	1	Proteobacteria	1	Gammaproteobacteria	1	Pseudomonadales	1	Pseudomonadaceae	1	Pseudomonas	1
Contig2337	Bacteria	1	Proteobacteria	1	Gammaproteobacteria	1	Pseudomonadales	0.91	Pseudomonadaceae	0.91	Pseudomonas	0.85
Contig2357	Bacteria	1	Proteobacteria	1	Gammaproteobacteria	1	Pseudomonadales	0.99	Pseudomonadaceae	0.99	Pseudomonas	0.99
Contig937	Bacteria	1	Proteobacteria	1	Alphaproteobacteria	1	Rhizobiales	1	Bartonellaceae	0.79	Bartonella	0.79
Contig907	Bacteria	1	Proteobacteria	1	Alphaproteobacteria	1	Rhizobiales	1	Brucellaceae	0.82	Ochrobactrum	0.81
Contig2363	Bacteria	1	Proteobacteria	1	Alphaproteobacteria	1	Rhizobiales	1	Bartonellaceae	0.82	Bartonella	0.82
Contig514	Bacteria	1	Proteobacteria	1	Alphaproteobacteria	0.89	Rhizobiales	0.8	Bartonellaceae	0.3	Bartonella	0.3
Contig458	Bacteria	1	Proteobacteria	1	Alphaproteobacteria	0.85	Rhizobiales	0.85	Rhizobiaceae	0.29	Rhizobium	0.29
Contig893	Bacteria	1	Proteobacteria	1	Alphaproteobacteria	0.96	Rhizobiales	0.91	Phyllobacteriaceae	0.24	Hoeflea	0.24
Contig2356	Bacteria	1	Proteobacteria	1	Alphaproteobacteria	0.99	Rhizobiales	0.93	Bartonellaceae	0.37	Bartonella	0.37
Contig909	Bacteria	1	Proteobacteria	1	Alphaproteobacteria	1	Rhodospirillales	1	Acetobacteraceae	0.99	Kozakia	0.4
Contig1974	Bacteria	1	Proteobacteria	0.98	Alphaproteobacteria	0.95	Rhodospirillales	0.93	Acetobacteraceae	0.93	Kozakia	0.65
Contig2315	Bacteria	1	Proteobacteria	0.97	Alphaproteobacteria	0.95	Rhodospirillales	0.95	Acetobacteraceae	0.9	Kozakia	0.42
Contig817	Bacteria	1	Proteobacteria	0.98	Alphaproteobacteria	0.97	Rhodospirillales	0.97	Acetobacteraceae	0.97	Swaminathania	0.43
Contig919	Bacteria	1	Proteobacteria	0.98	Alphaproteobacteria	0.98	Rhodospirillales	0.98	Acetobacteraceae	0.98	Saccharibacter	0.28
Contig1081	Bacteria	1	Proteobacteria	1	Alphaproteobacteria	1	Rhodospirillales	0.99	Acetobacteraceae	0.99	Gluconacetobacter	0.97
